# Supplementary material for: Measurement report: Atmospheric Ice Nuclei at Changbai Mountain (2623 m a.s.l.) in Northeastern Asia
Source: Copernicus journal article supplement (doi:10.5194/egusphere-2023-925), 2023-06-15
Supplement: Supplementary file 1 [file egusphere-2023-925-supplement.pdf]

## Measurement report: Atmospheric Ice Nuclei at Changbai Mountain (2623 m a.s.l.) in Northeastern Asia

5 Yue Sun<sup>1</sup>, Yujiao Zhu<sup>1</sup>, Yanbin Qi<sup>2</sup>, Lanxiadi Chen<sup>3</sup>, Jiangshan Mu<sup>1</sup>, Ye Shan<sup>1</sup>, Yu Yang<sup>1</sup>, Yanqiu  
Nie<sup>1</sup>, Ping Liu<sup>1</sup>, Can Cui<sup>1</sup>, Ji Zhang<sup>1</sup>, Mingxuan Liu<sup>1</sup>, Lingli Zhang<sup>4</sup>, Yufei Wang<sup>2</sup>, Xinfeng Wang<sup>1</sup>,  
Mingjin Tang<sup>3</sup>, Wenxing Wang<sup>1</sup>, Likun Xue<sup>1</sup>

<sup>1</sup>Environment Research Institute, Shandong University, Qingdao 266237, China

<sup>2</sup>Jilin Provincial Technology Center for Meteorological Disaster Prevention, Changchun 130062, China

10 <sup>3</sup>State Key Laboratory of Organic Geochemistry, Guangzhou Institute of Geochemistry, Chinese Academy of Sciences,  
Guangzhou 510640, China

<sup>4</sup>Changbai Mountain Meteorological Observatory, An Tu, Jilin 133613, China

*Correspondence to:* Yujiao Zhu (zhuyujiao@sdu.edu.cn), Likun Xue (xuelikun@sdu.edu.cn)

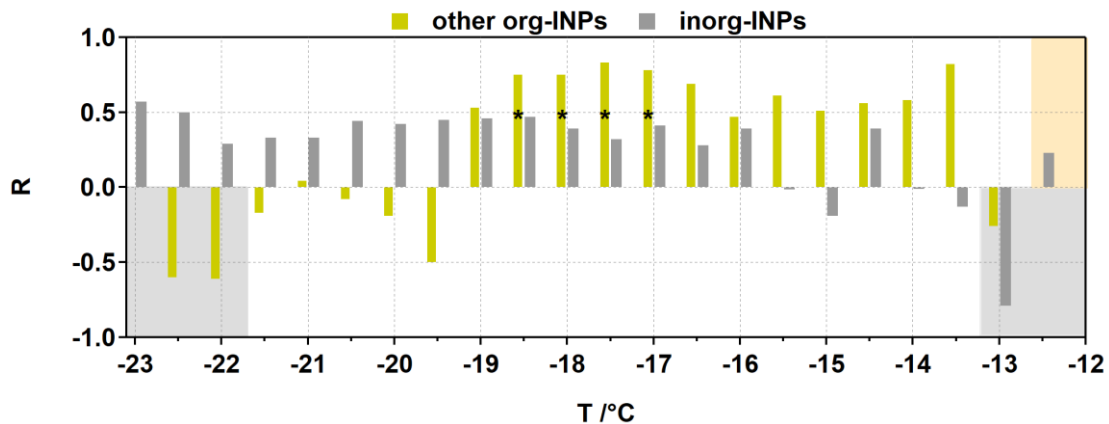

15 Figure S1. The relationship between PBL height and  $N_{\text{INP-other org}}$  as well as  $N_{\text{INP-inorg}}$  during daytime (8:00-17:00, m above ground level) as a function of temperature. The asterisk indicates  $p < 0.05$ . The orange and gray shades indicate that the data points number of the other org-INPs and inorg-INPs were less than half of all samples at each temperature.

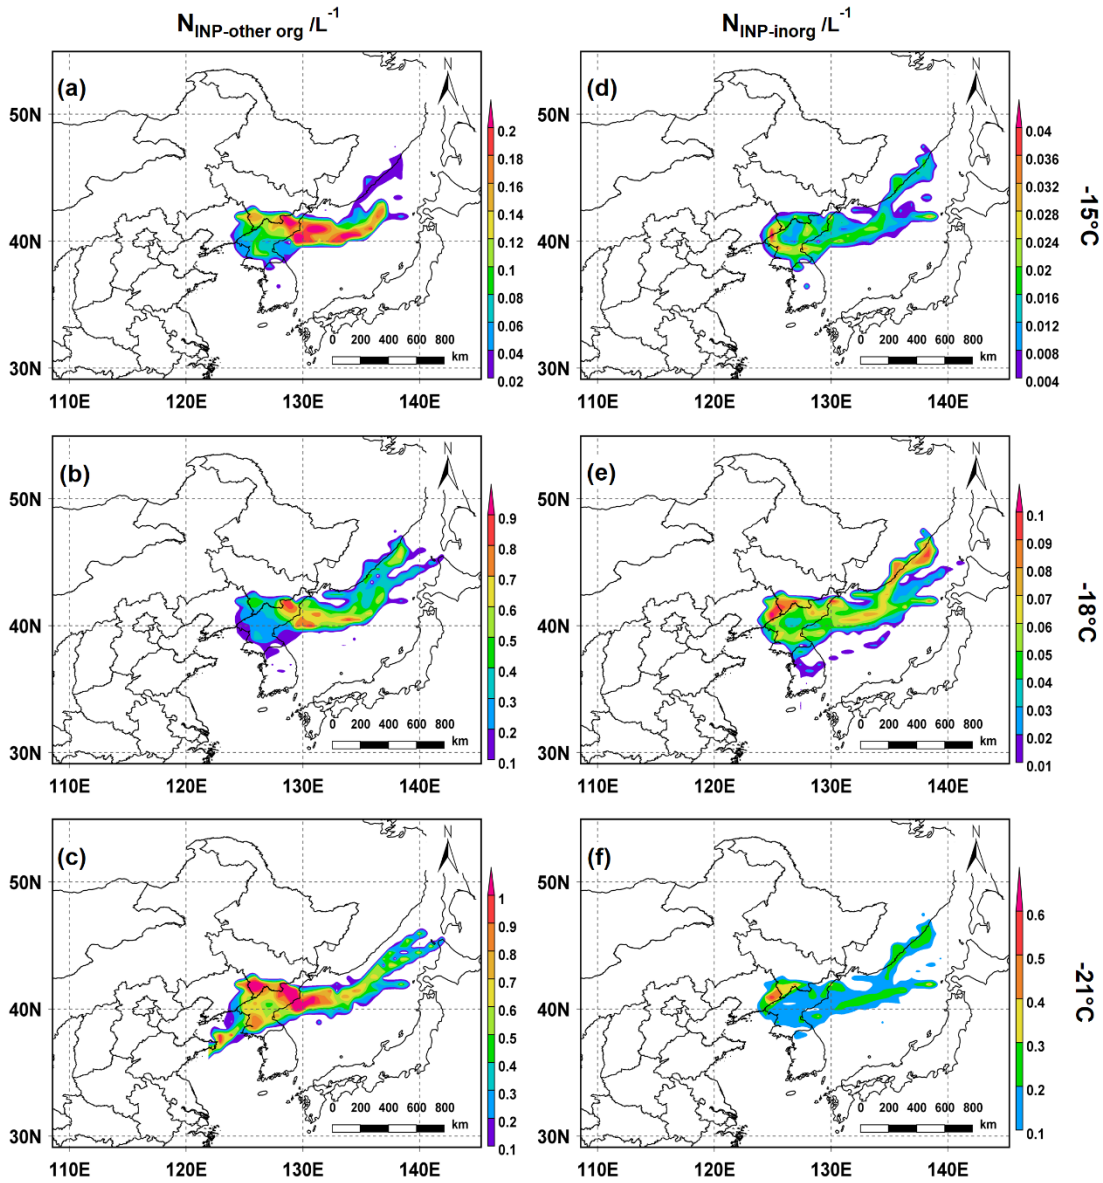

20 Figure S2. The concentration-weighted trajectory (CWT) analysis for the distribution of  $N_{\text{INP-other org}}$  (a-c) and  $N_{\text{INP-inorg}}$  (d-f) at  $-15^\circ\text{C}$ ,  $-18^\circ\text{C}$  and  $-21^\circ\text{C}$ .
